# Supplementary material for: Tailoring the phase composition of carbon-coated nickel sulfides to achieve a high specific capacitance
Source: Royal Society of Chemistry journal article supplement (doi:10.1039/d3dt02130k), 2023-01-01
Supplement: d3dt02130k1.pdf [file d3dt02130k1.pdf]

# Tailoring the phase composition of carbon-coated nickel sulfides to achieve a high specific capacitance

Ü. Kurtan<sup>a,\*</sup>, B. Üstün<sup>b</sup>, H. Aydın<sup>c</sup>, S.N. Koç<sup>b</sup>

<sup>a</sup>Department of Vocational School of Technical Sciences, İstanbul University-Cerrahpaşa,  
34500, İstanbul/Turkey

<sup>b</sup>Department of Chemical Engineering, İstanbul University-Cerrahpaşa,  
34500, İstanbul/Turkey

<sup>c</sup>Department of Chemistry, İstanbul University-Cerrahpaşa, 34500, İstanbul/Turkey

## 1. Materials Characterization

The crystallographic information, morphology, structure, and phase composition of the as-obtained materials were characterized by powder X-ray diffraction (XRD, PANalytical Empyrean), X-ray photoelectron spectroscopy (XPS, Thermo Scientific K-Alpha), Fourier transform infrared spectroscopy (FTIR, Alpha-P analyzer), scanning electron microscopy (SEM; Zeiss Sigma 300, operated at 3 kV), transmission electron microscopy (TEM; Hitachi HT7700), Raman analysis (WITech Alpha 300R Raman spectrometer with an air-cooled DPSS laser up to 100 mW at 532 nm), thermogravimetric analysis (TGA, Perkin Elmer STA 6000), and BET (N<sub>2</sub> adsorption and desorption isotherms by a Micromeritics at 76 K).

## 2. Calculation

The specific capacitance of the NiS<sub>2</sub>, NiS@C0, NiS/NiS<sub>2</sub>@C1, and NiS/NiS<sub>2</sub>@C2 electrodes was calculated from the GCD curve according to the following equation<sup>1,2</sup>:

$$C_s = \frac{I \times \Delta t}{m \times \Delta V} \quad (\text{S1})$$

where C<sub>s</sub> (F/g) is the specific capacitance of the working electrode, I (A) is the discharge current, Δt (s) is the discharge time, m (g) is the mass of the active material in the working electrode, and ΔV (V) is the discharge potential range, respectively.

## 3. Results

TGA was carried out to evaluate the thermal stability of the as-prepared nickel sulfides including NiS<sub>2</sub>, NiS@C0, NiS/NiS<sub>2</sub>@C1, and NiS/NiS<sub>2</sub>@C2 electrodes. The NiS<sub>2</sub> nanoparticles exhibited a considerable mass loss which may be related to the organic substance (thiourea) attached to the nanoparticles, sulfur elimination or a possible phase transition. The TGA plot for NiS@C0, NiS/NiS<sub>2</sub>@C1, and NiS/NiS<sub>2</sub>@C2 showed the mass losses which can be related to Ni-S phase transition and elimination of the carbon<sup>3,4</sup>.

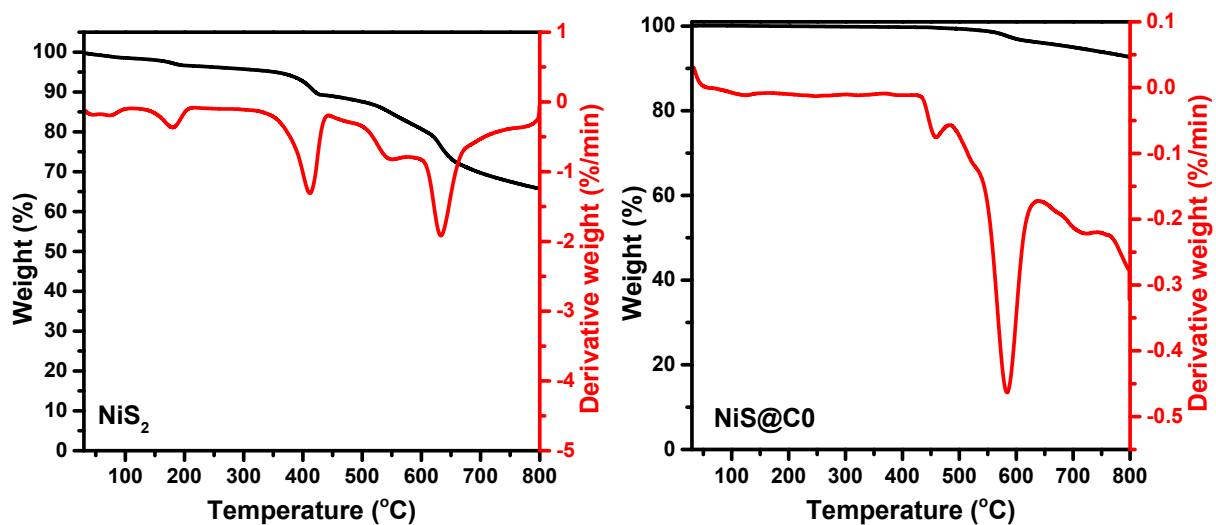

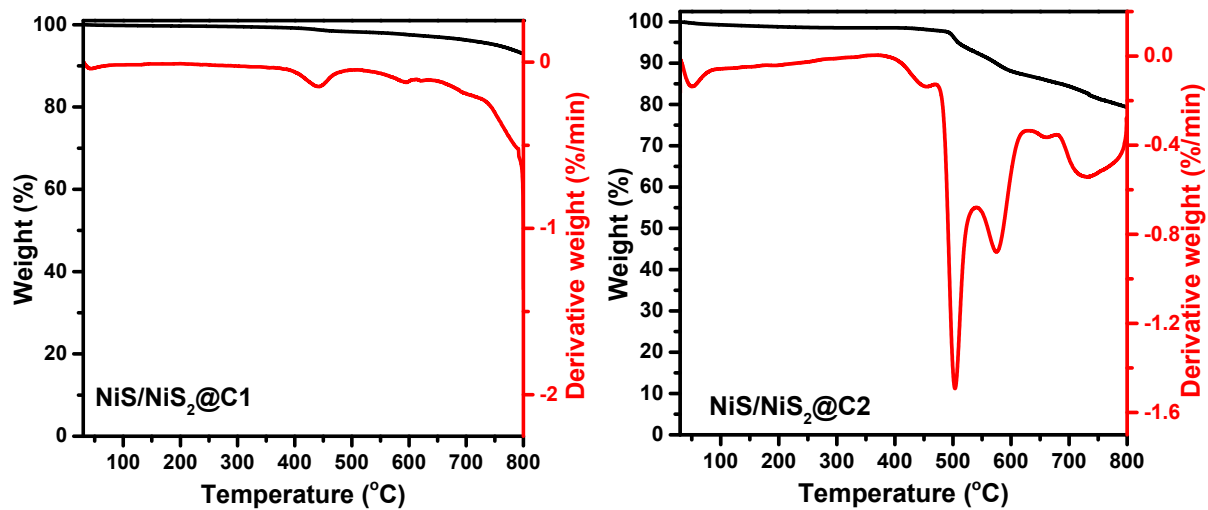

**Fig. S1.** TGA curves of NiS<sub>2</sub>, NiS@C0, NiS/NiS<sub>2</sub>@C1, NiS/NiS<sub>2</sub>@C2 nanocomposites.

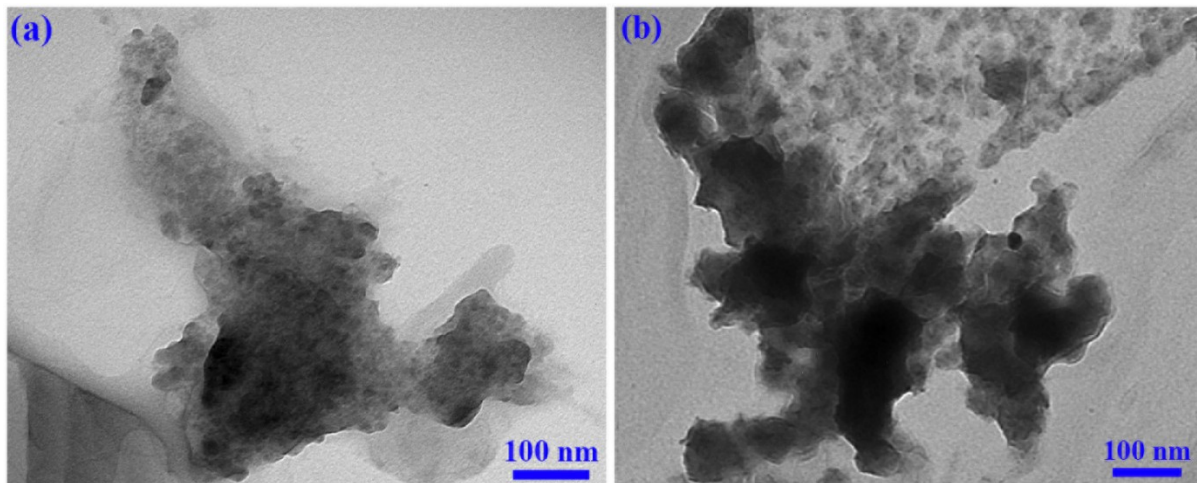

**Fig. S2.** TEM image of the (a) pure NiS<sub>2</sub> and (b) NiS<sub>2</sub>/NiS@C0 electrode.

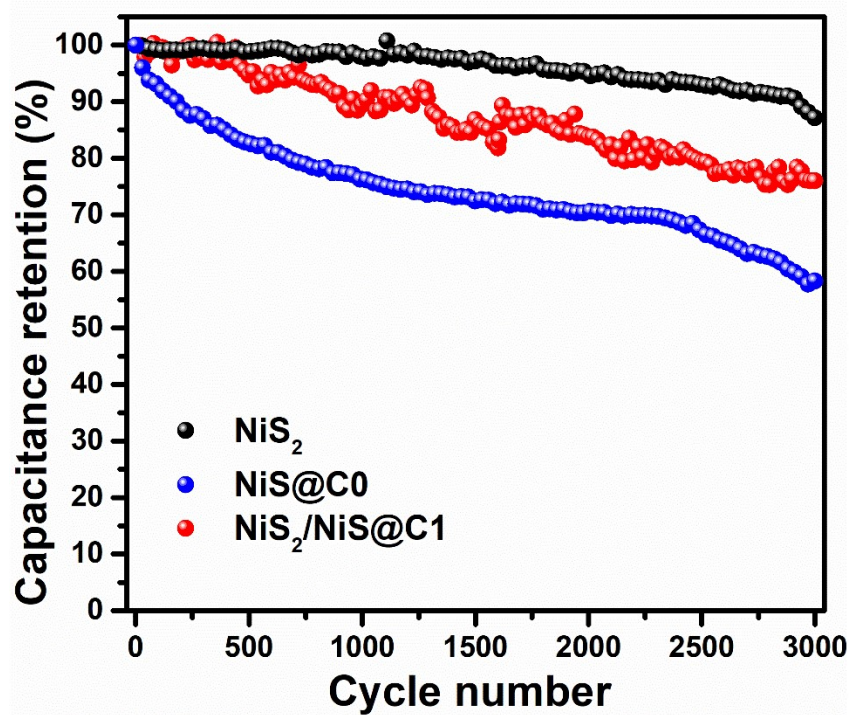

Fig. S3. Cycle stability at 5 A/g of the NiS<sub>2</sub>, NiS@C0, and NiS<sub>2</sub>/NiS@C1 electrode.

Table S1. XPS data of the NiS<sub>2</sub>/NiS@C1 electrode.

| Element | Concentration (at. %) | Transition peak | Peak area (counts) | Concentration (at. %) |
|---------|-----------------------|-----------------|--------------------|-----------------------|
| Ni      | 5.13                  | Ni 2p           | 852.97             | 26.8                  |
|         |                       | Ni 2p           | 855.35             | 14.7                  |
|         |                       | Ni 2p           | 870.27             | 16.8                  |
|         |                       | Ni 2p           | 873.47             | 16.45                 |
|         |                       | Ni 2p           | 859.48             | 9.8                   |
|         |                       | Ni 2p           | 877.38             | 15.45                 |
| S       | 17.07                 | S 2p            | 161.76             | 49                    |
|         |                       | S 2p            | 162.93             | 35.7                  |
|         |                       | S 2p            | 164.00             | 15.3                  |
| C       | 59.3                  | C 1s            | 284.88             | 92.2                  |
|         |                       | C 1s            | 287.6              | 7.8                   |
| O       | 15.64                 | O 1s            | 531.93             | 100                   |
| N       | 2.86                  | N 1s            | 398.47             | 56.4                  |
|         |                       | N 1s            | 400.71             | 43.6                  |

#### 4. References

- 1 H. Aydın, U. Kurtan, M. Demir and S. Karakuş, *Energy & Fuels*, , DOI:10.1021/acs.energyfuels.1c04208.
- 2 U. Kurtan and H. Aydın, *J. Energy Storage*, 2021, **42**, 103016.
- 3 N. Kumar, N. Raman and A. Sundaresan, *J. Solid State Chem.*, 2013, **208**, 103–108.
- 4 M. G. S. Da Silva, C. M. Leite, M. A. L. Cordeiro, V. R. Mastelaro and E. R. Leite, *ACS Appl. Energy Mater.*, 2020, **3**, 9498–9503.
